# Supplementary material for: Toxicity and Biological Effects of Beauveria brongniartii Fe0 Nanoparticles against Spodoptera litura (Fabricius)
Source: PubMed Central journal article supplement (PMC7767332; doi:10.3390/insects11120895), 2020-12-21
Supplement: insects-11-00895-s001.pdf [file insects-11-00895-s001.pdf]

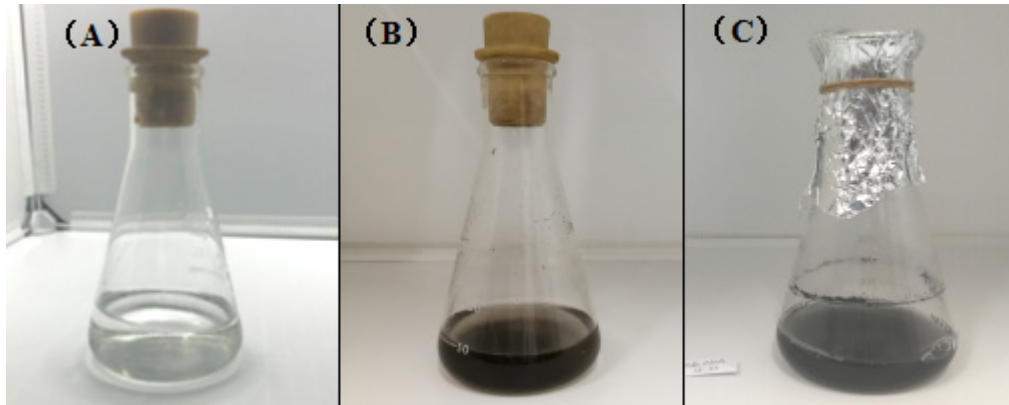

**Supplementary Figure S1.** Changes in colour of culture filtrate during extracellular synthesis of *Beuveria brongniartii* Fe<sup>0</sup>NPs (A) *B. brongniartii* conidial filtrate; (B) 1 mM Fe<sup>0</sup>; and (C) *B. brongniartii* Fe<sup>0</sup>NPs.

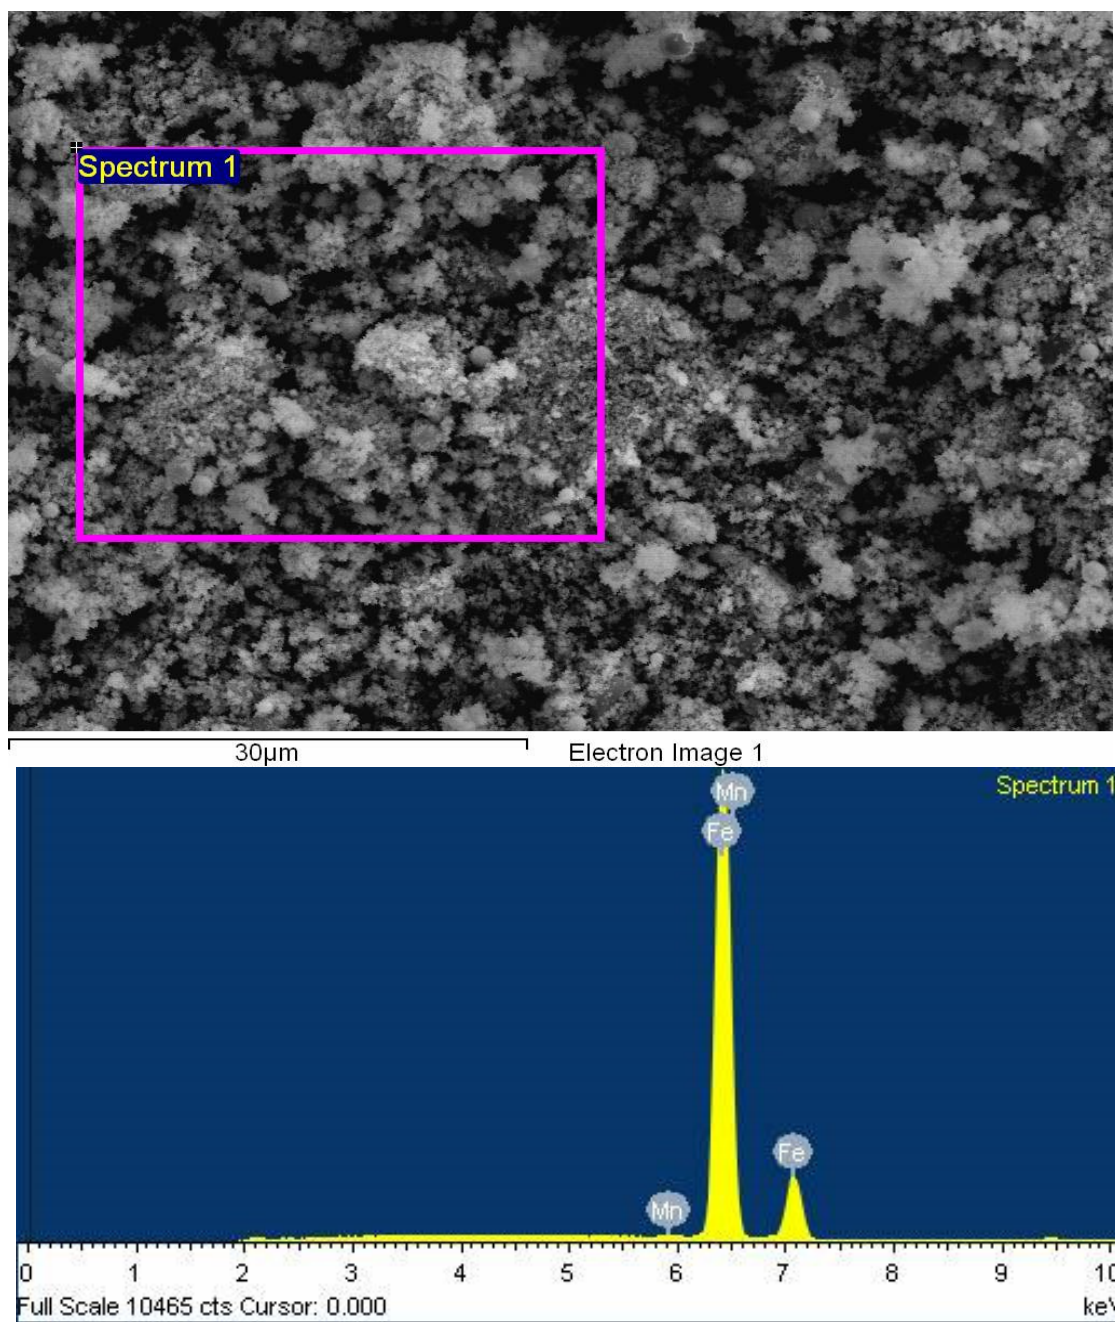

**Supplementary Figure S2.** Energy dispersive X-ray spectroscopy profile of *Beauveria brongniartii* Fe<sup>0</sup>NPs.
